# Supplementary material for: Promoter methylation-associated loss of ID4 expression is a marker of tumour recurrence in human breast cancer
Source: PubMed Central journal article supplement (PMC2435120; doi:10.1186/1471-2407-8-154), 2008-05-30
Supplement: 1471-2407-8-154-S2.pdf [file 1471-2407-8-154-S2.pdf]

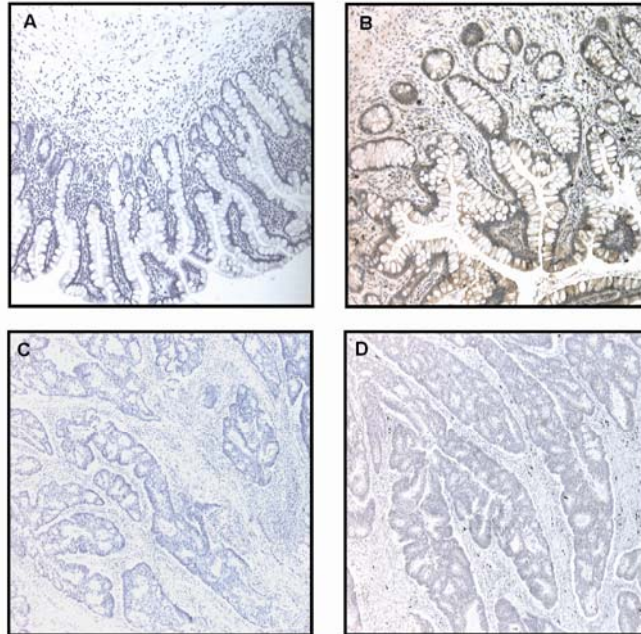

**Additional file 2:** Positive controls for the immunohistochemical staining with normal and tumorous colon tissues for a polyclonal ID4 antibody (sc-491). A) and C) are negative controls without ID4 antibody incubation for normal and tumorous colon tissues, respectively. B) Intensive cytoplasmatic staining of a normal colon tissue. D) Negative ID4 protein staining for an infiltrating colon carcinoma ( G2, pT2, pN0, pMx).”
